# Supplementary material
Source: PubMed Central journal article supplement (PMC4133222)

## **Supplemental Material to:**

**Eva Bartova, Veronika Foltankova, Soňa Legartova, Petra Sehnalova, Dmitry V Sorokin, Jana Suchankova, and Stanislav Kozubek**

**Coilin is rapidly recruited to UVA-induced DNA lesions and gamma-radiation affects localized movement of Cajal bodies**

**Nucleus 2014; 5(3)**

**<http://dx.doi.org/10.4161/nucl.29229>**

**<http://www.landesbioscience.com/journals/nucleus/article/29229/>**

|    |             | Number of CBs |           |           |           |           |
|----|-------------|---------------|-----------|-----------|-----------|-----------|
|    |             | 0             | 1         | 2         | 3         | 4         |
| G1 | cell number | 89            | 139       | 82        | 24        | 3         |
|    | % of cells  | 26.409496     | 41.246291 | 24.332344 | 7.1216617 | 0.8902077 |
| G2 | cell number | 45            | 110       | 61        | 14        | 2         |
|    | % of cells  | 19.396552     | 47.413793 | 26.293103 | 6.0344828 | 0.862069  |

|    | Mean   | Std.Dev | Std.Err |
|----|--------|---------|---------|
| G1 | 1.1484 | 0.9235  | 0.0503  |
| G2 | 1.2155 | 0.856   | 0.0562  |

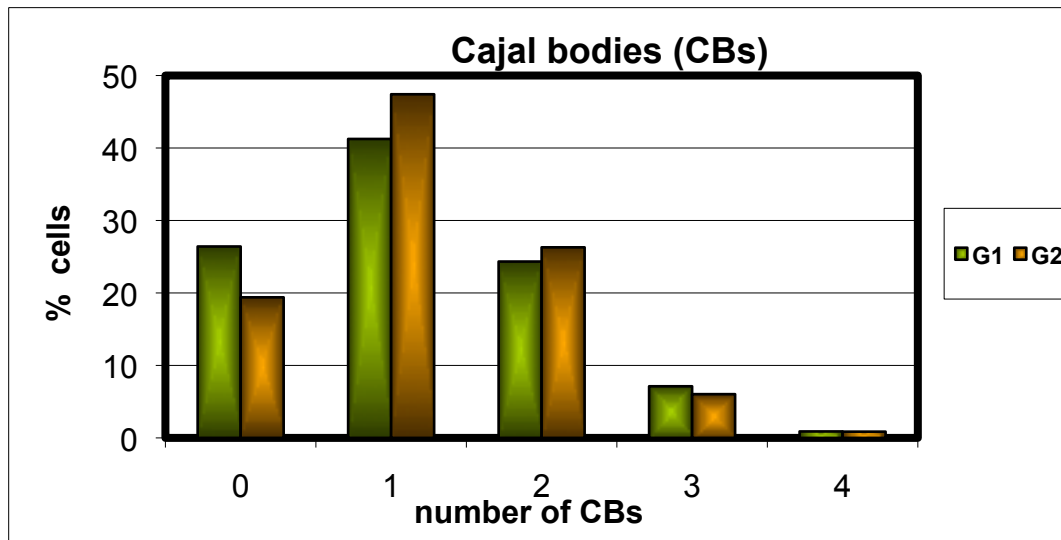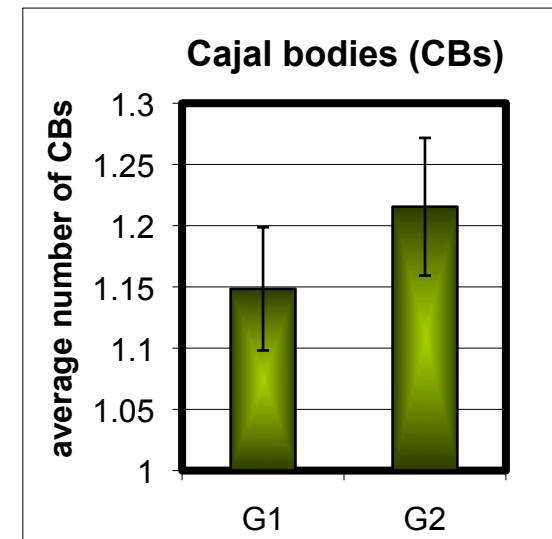

Supplement: nucl-5-269-s01.pdf [file nucl-5-269-s01.pdf]
